# Supplementary material
Source: HighWire-hosted journal article supplement (https://gh.bmj.com/content/5/5/e002260)
Supplement: inline-supplementary-material-2 [file inline-supplementary-material-2.pdf]

### Cost-effectiveness acceptability curve for RBF compared to non-RBF

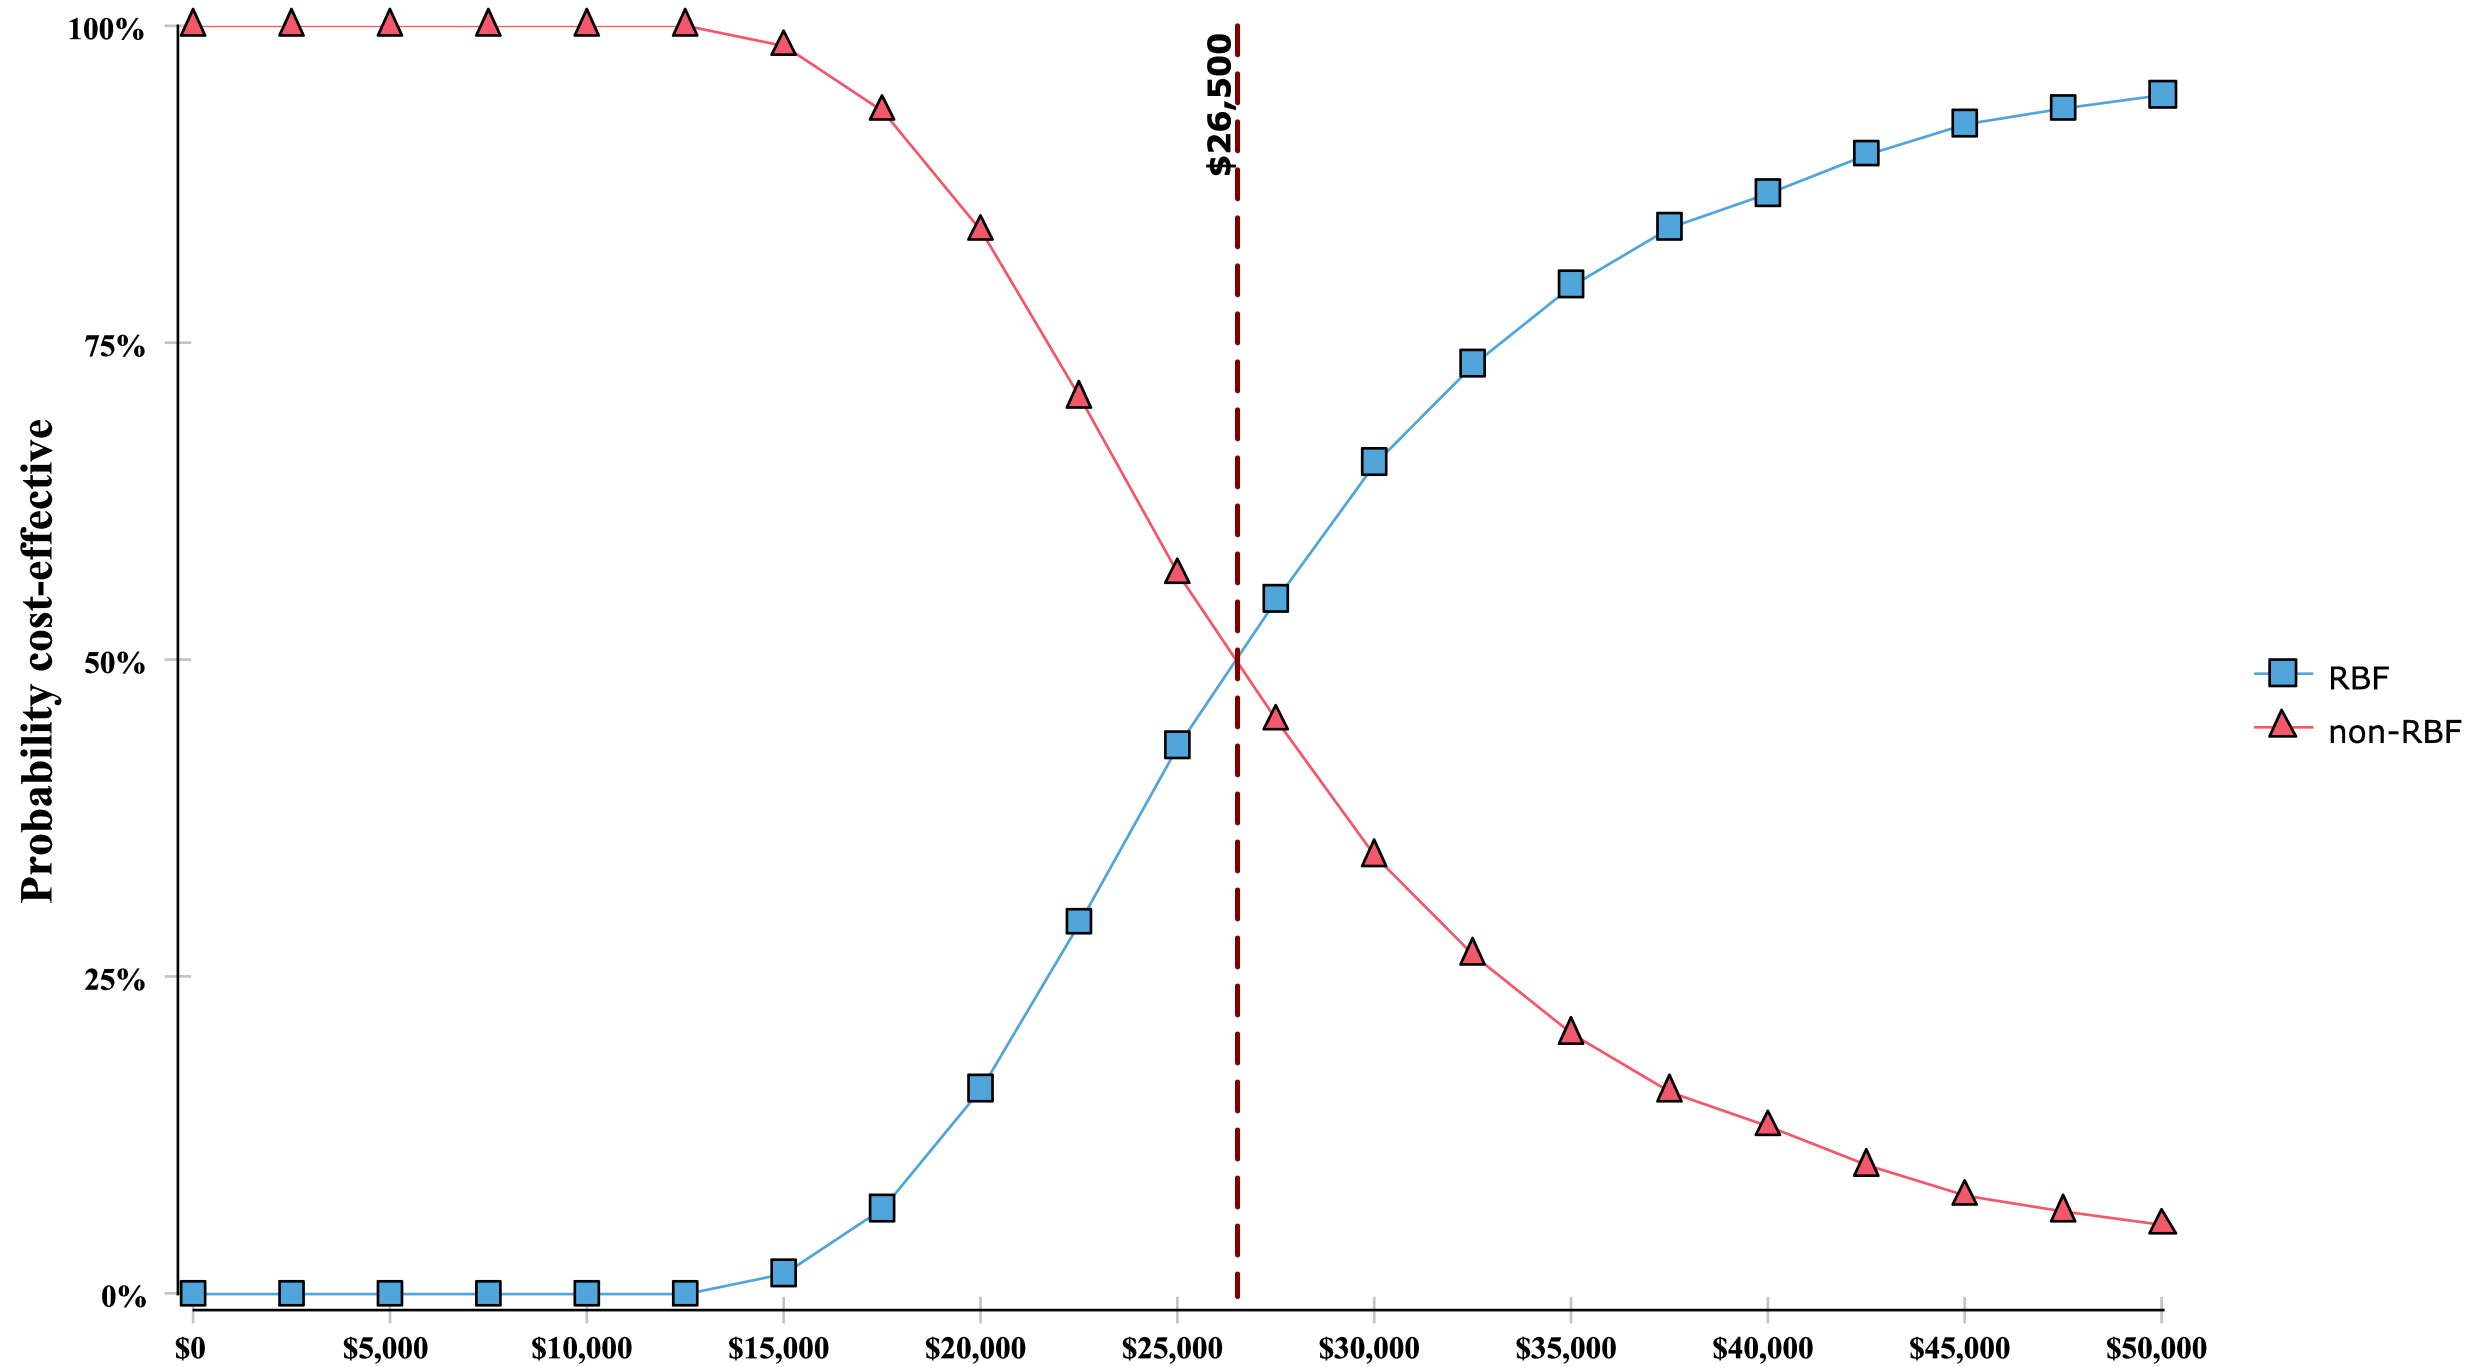

Supplementary Figure 1: Willingness to pay per death averted
